# Supplementary figures and images for: Genome-Wide Analysis for Early Growth-Related Traits of the Locally Adapted Egyptian Barki Sheep
Source: MDPI journal article supplement (doi:10.3390/genes12081243), 2021-08-13

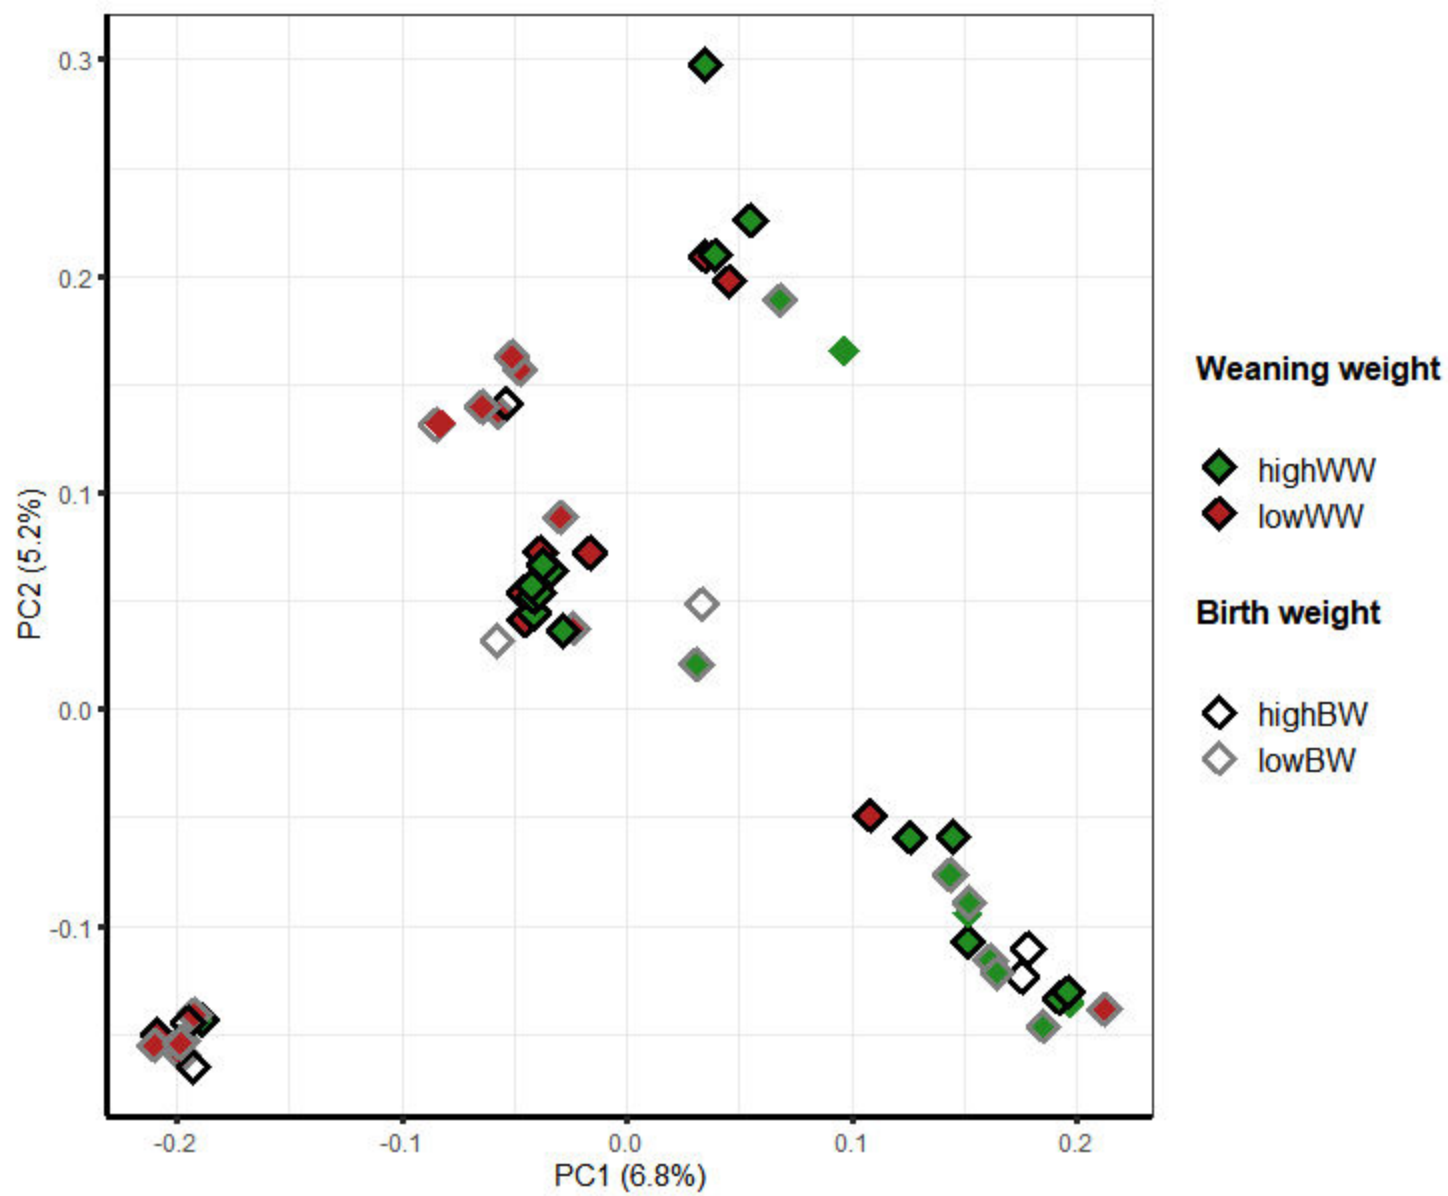

Supplement: s1 [file s1]

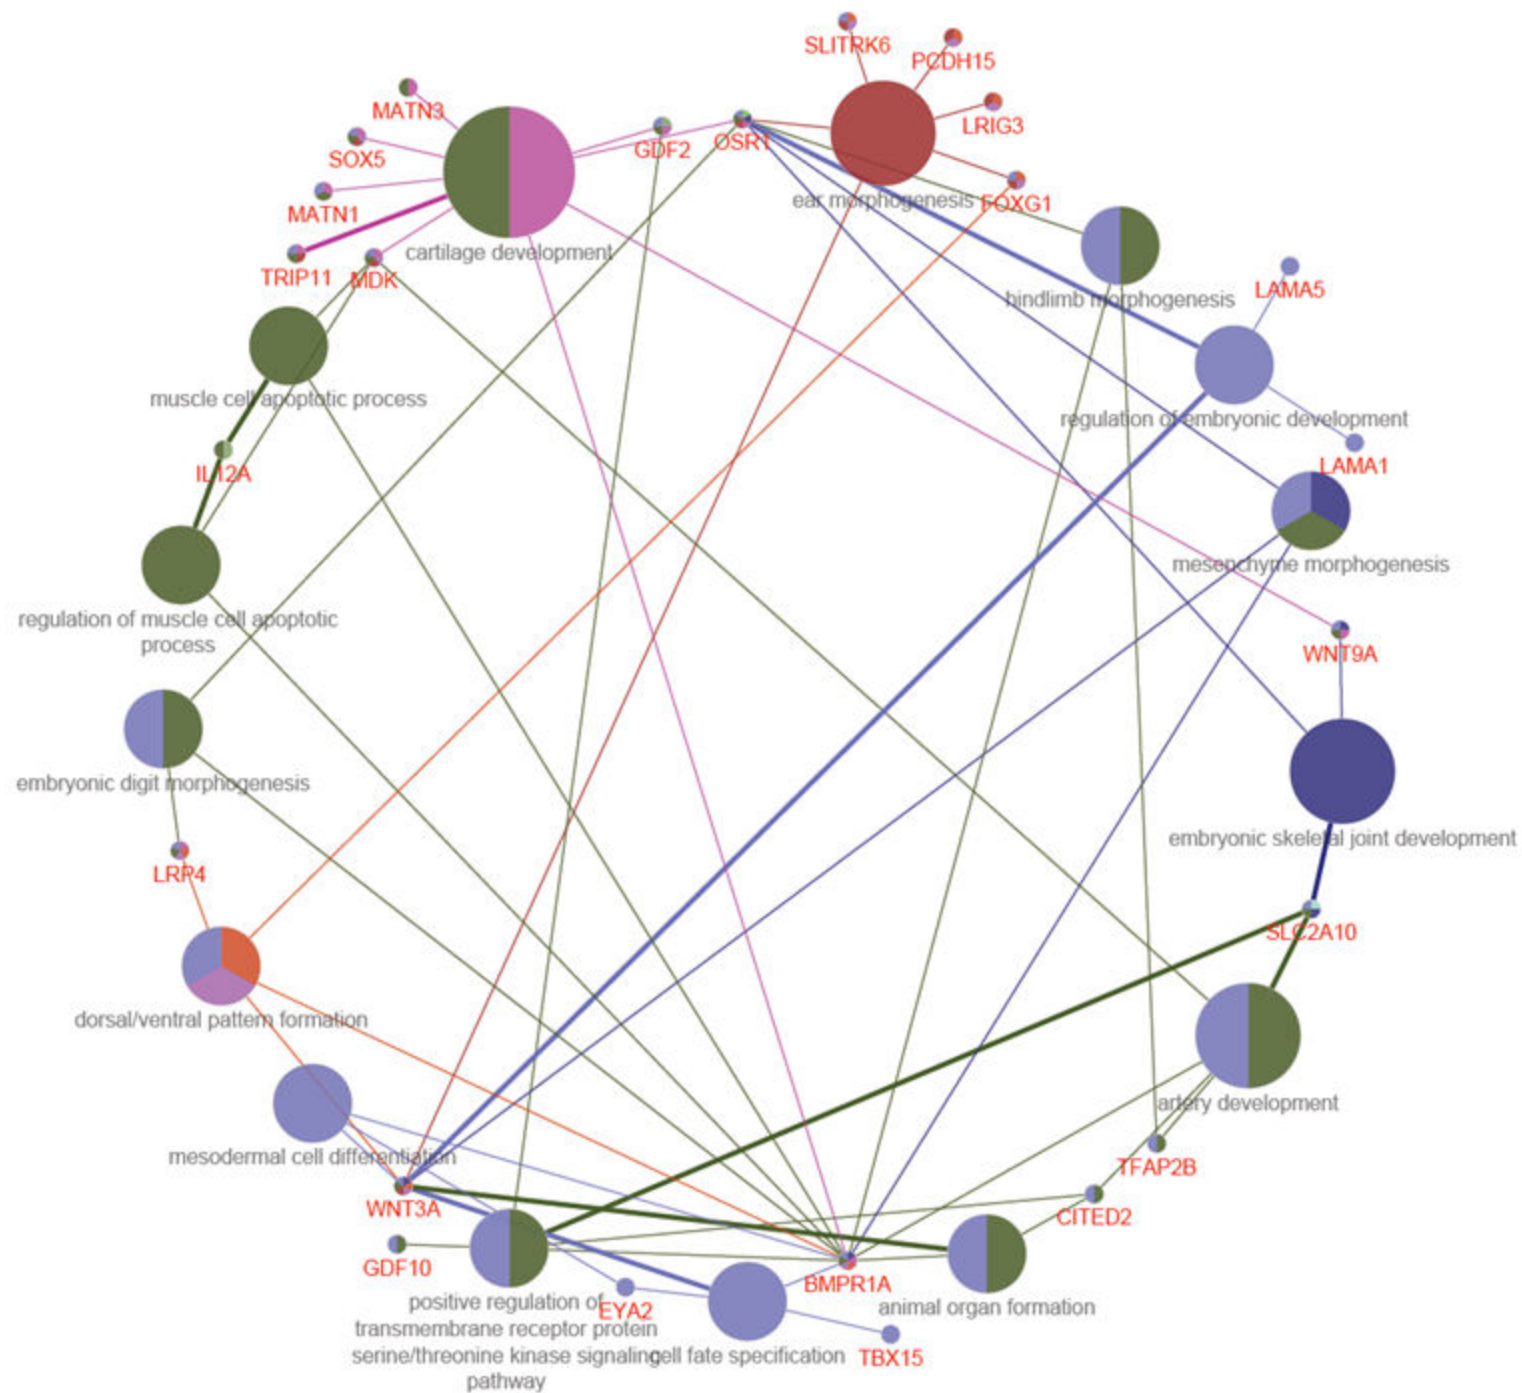

Supplement: s1 [file s1]
